# Supplementary material
Source: PubMed Central journal article supplement (PMC2828893)
Supplement: 97320630004094S1.pdf [file 97320630004094S1.pdf]

## Supplementary material:

**Table 1:** Nucleotide identities and protein identities of novel virus from 2009 pandemic

| PREVIOUS STRAINS                 | 2009 STRAINS(H1N1) |                 |                  |    |                   |    |
|----------------------------------|--------------------|-----------------|------------------|----|-------------------|----|
|                                  | A/Mexico/3955/09   |                 | A/New York/18/09 |    | A/Thailand/104/09 |    |
|                                  | NU*                | PR <sup>†</sup> | NU               | PR | NU                | PR |
| <b>Neuraminidase (NA)</b>        |                    |                 |                  |    |                   |    |
| A/Brevig Mission/18              | 83                 | 87              | 83               | 87 | 83                | 87 |
| A/Swine/England/195852/92        | 94                 | 94              | 93               | 94 | 94                | 94 |
| A/Swine/Belgium/1/98             | 92                 | 93              | 92               | 92 | 92                | 93 |
| A/Swine/Zhejiang/1/07            | 91                 | 91              | 91               | 91 | 91                | 91 |
| A/Texas/27/08                    | 79                 | 80              | 79               | 80 | 79                | 80 |
| A/Hong Kong/156/97(H5N1)         | 88                 | 88              | 88               | 88 | 88                | 88 |
| <b>Haemagglutinin (HA)</b>       |                    |                 |                  |    |                   |    |
| A/South Carolina/1918(H1N1)      | 82                 | 85              | 82               | 86 | 82                | 86 |
| A/Wisconsin/1/2008(H1N1)         | 77                 | 78              | 77               | 79 | 77                | 79 |
| A/Swine/kansas/00246/04(H1N2)    | 93                 | 92              | 93               | 92 | 93                | 92 |
| A/Swine/Indiana/9k035/99(H1N2)   | 95                 | 95              | 95               | 95 | 95                | 95 |
| A/Swine/Wisconsin/125/1997(H1N1) | 90                 | 90              | 90               | 90 | 90                | 90 |
| A/Swine/I10700324/2007(H1N1)     | 89                 | 90              | 89               | 90 | 89                | 90 |

\*NU = Nucleotide; <sup>†</sup>PR = Protein
